# Supplementary material
Source: PubMed Central journal article supplement (PMC6439560)
Supplement: jamacardiol-4-246-s001.pdf [file jamacardiol-4-246-s001.pdf]

## Supplementary Online Content

Shimizu W, Makimoto H, Yamagata K, et al. Association of genetic and clinical aspects of congenital long QT syndrome with life-threatening arrhythmias in Japanese patients. *JAMA Cardiol*. Published online February 13, 2019. doi:10.1001/jamacardio.2018.4925

### **eAppendix.** Methods

**eTable 1.** LQT1 Mutations or Rare Variants

**eTable 2.** LQT2 Mutations or Rare Variants

**eTable 3.** LQT3 Mutations or Rare Variants

**eTable 4.** *SCN5A* Mutations/Variants in Japanese LQTS Registry

**eFigure 1.** Distribution of QTc Intervals in Genotyped Congenital Long QT Syndrome

**eFigure 2.** Cumulative Probability of First Event in Each Genotype of Congenital Long-QT Syndrome

**eFigure 3.** Mutation Site-Specific Difference in Syncope or Lethal Cardiac Events in LQT1

This supplementary material has been provided by the authors to give readers additional information about their work.

## **eAppendix. Methods**

### **Data acquisition institutions:**

National Cerebral and Cardiovascular Center, Suita Osaka;  
Shiga University of Medical Science, Otsu;  
Kyoto University, Kyoto;  
Kagoshima Medical Center, Kagoshima;  
Kanazawa University, Kanazawa;  
Niigata University, Niigata;  
Okayama University, Okayama;  
Nagasaki University, Nagasaki;  
Keio University, Tokyo;  
Nihon University, Tokyo;  
Tokyo Women's Medical University, Tokyo

### **Genetic screening institutions:**

National Cerebral and Cardiovascular Center,  
Shiga University of Medical Science Hospital,  
Kyoto University Hospital,  
Kagoshima Medical Center,  
Kanazawa University Hospital,  
Niigata University Hospital,  
Okayama University Hospital,  
Nagasaki University Hospital,  
Keio University Hospital.

### **Bioinformatic Analysis**

Pathogenicity of variants was by frequency referring to the NCBI dbSNP database (<http://www.ncbi.nlm.nih.gov/snp/>), the Human Genetic Variation Browser (an SNP database in Japanese; <http://www.genome.med.kyoto-u.ac.jp/SnpDB/>), the 1000 Genomes database (<http://www.1000genomes.org/home>) and our in-house data compiled from 1,000 Japanese individuals.<sup>1</sup>

### **eReference**

1. Shigemizu D, Aiba T, Nakagawa H, et al. Exome analyses of long QT syndrome reveal candidate pathogenic mutations in calmodulin-interacting genes. *PLoS one*. 2015;10:e0130329.

**eTable 1.** LQT1 Mutations or Rare Variants

| Mutation         | site         | Site    | N           | Female<br>(n) | Proband<br>(n) | Mean QTc<br>(proband) | Syncope<br>(n) | CA/VF<br>(n) |   |   |
|------------------|--------------|---------|-------------|---------------|----------------|-----------------------|----------------|--------------|---|---|
| c.153C>A         | p.Y51X       | N       | N/C-term    | 1             | 0              | 1                     | 443            | 1            | 0 |   |
| c.332A>G         | p.Y111C      | N       | N/C-term    | 1             | 1              | 1                     | 551            | 1            | 1 |   |
| c.350C>T         | p.P117L      | N       | N/C-term    | 5             | 2              | 3                     | 520            | 2            | 1 |   |
| c.377A>C         | p.H126P      | N       | N/C-term    | 2             | 1              | 1                     | 495            | 0            | 0 |   |
| c.521G>A         | p.R147H      | MS      | non-pore MS | 2             | 1              | 1                     | 444            | 1            | 0 |   |
| c.502G>A         | p.G168R      | MS      | non-pore MS | 8             | 7              | 2                     | 500            | 0            | 0 |   |
| c.520C>T         | p.R174C      | C-loop  | non-pore MS | 7             | 4              | 3                     | 466            | 1            | 0 |   |
| c.521G>A         | p.R174H      | C-loop  | non-pore MS | 1             | 0              | 1                     | 476            | 0            | 0 |   |
| c.530C>A         | p.S177T      | C-loop  | non-pore MS | 2             | 1              | 1                     | 440            | 0            | 0 |   |
| c.532G>A         | p.A178T      | C-loop  | non-pore MS | 5             | 1              | 2                     | 528            | 1            | 1 |   |
| * p.A178-G189del |              | C-loop  | non-pore MS | 1             | 1              | 1                     | 471            | 0            | 0 |   |
| c.557G>A         | p.G186D      | C-loop  | non-pore MS | 2             | 2              | 1                     | 458            | 0            | 0 |   |
| c.566G>A         | p.G189A      | C-loop  | non-pore MS | 2             | 1              | 1                     | 474            | 1            | 0 |   |
| c.565G>A         | p.G189R      | C-loop  | non-pore MS | 2             | 1              | 1                     | 521            | 0            | 0 |   |
| c.568C>T         | p.R190W      | C-loop  | non-pore MS | 2             | 1              | 2                     | 471            | 1            | 0 |   |
| c.569G>A         | p.R190Q      | C-loop  | non-pore MS | 9             | 3              | 6                     | 478            | 3            | 0 |   |
| c.739T>C         | p.F193L      | MS      | non-pore MS | 4             | 2              | 1                     | 480            | 0            | 0 |   |
| c.589C>T         | p.P197S      | MS      | non-pore MS | 3             | 1              | 1                     | 511            | 0            | 0 |   |
| c.657 delG       | p.G219fsX236 | MS      | non-pore MS | 3             | 0              | 1                     | 470            | 0            | 0 |   |
| c.674C>T         | p.S225L      | MS      | non-pore MS | 2             | 0              | 1                     | 448            | 2            | 0 |   |
| c.677C>T         | p.A226V      | MS      | non-pore MS | 6             | 5              | 3                     | 466            | 3            | 0 |   |
| c.691C>T         | p.R231C      | MS      | non-pore MS | 1             | 1              | 1                     | 493            | 1            | 1 |   |
|                  | p.R237P      | MS      | non-pore MS | 1             | 1              | 1                     | 598            | 1            | 0 |   |
| c.724G>A         | p.D242N      | C-loop  | non-pore MS | 9             | 6              | 5                     | 494            | 2            | 0 |   |
| c.727C>T         | p.R243C      | C-loop  | non-pore MS | 9             | 6              | 5                     | 476            | 5            | 1 |   |
| c.728G>A         | p.R243H      | C-loop  | non-pore MS | 5             | 4              | 2                     | 447            | 1            | 1 |   |
| ** p.W248F       |              | C-loop  | non-pore MS | 1             | 1              | 1                     | 460            | 1            | 0 |   |
| c.749T>A         | p.L250H      | C-loop  | non-pore MS | 4             | 2              | 3                     | 459            | 2            | 0 |   |
| c.760G>A         | p.V254M      | C-loop  | non-pore MS | 28            | 13             | 11                    | 495            | 22           | 4 |   |
| c.773 A>C        | p.H258P      | C-loop  | non-pore MS | 5             | 3              | 3                     | 455            | 3            | 1 |   |
| c.775C>T         | p.R259C      | C-loop  | non-pore MS | 3             | 3              | 2                     | 480            | 2            | 0 |   |
| c.781G>T         | 782A>T       | p.E261L | C-loop      | non-pore MS   | 2              | 1                     | 1              | 524          | 1 | 0 |
| c.805G>T         | p.G269C      | MS      | S5-pore-S6  | 1             | 1              | 1                     | 516            | 1            | 0 |   |
| c.805G>A         | p.G269S      | MS      | S5-pore-S6  | 20            | 10             | 10                    | 472            | 6            | 2 |   |
| c.815G>A         | p.G272D      | MS      | S5-pore-S6  | 2             | 1              | 1                     | 476            | 0            | 0 |   |
| c.815G>T         | p.G272V      | MS      | S5-pore-S6  | 3             | 2              | 2                     | 437            | 2            | 0 |   |
| c.828-830delCTC  | p.276delS    | MS      | S5-pore-S6  | 2             | 1              | 1                     | 566            | 0            | 0 |   |

|                              |                  |    |            |    |    |    |     |    |   |
|------------------------------|------------------|----|------------|----|----|----|-----|----|---|
| c.830C>T                     | p.S277L          | MS | S5-pore-S6 | 10 | 6  | 7  | 488 | 3  | 0 |
| c.916G>C                     | p.G306R          | MS | S5-pore-S6 | 2  | 0  | 1  | 474 | 0  | 0 |
| c.931A>G                     | p.T311A          | MS | S5-pore-S6 | 2  | 2  | 1  | 439 | 1  | 0 |
| c.938T>A                     | p.I313K          | MS | S5-pore-S6 | 8  | 4  | 2  | 484 | 8  | 2 |
| c.940G>A                     | p.G314S          | MS | S5-pore-S6 | 7  | 4  | 4  | 506 | 5  | 3 |
| c.941G>C                     | p.G314A          | MS | S5-pore-S6 | 1  | 1  | 1  | 582 | 1  | 0 |
| c.944A>G                     | p.Y315C          | MS | S5-pore-S6 | 5  | 4  | 3  | 521 | 2  | 1 |
| c.947G>A                     | p.G316E          | MS | S5-pore-S6 | 2  | 2  | 2  | 490 | 1  | 0 |
| c.1111G>T                    | p.D317Y          | MS | S5-pore-S6 | 2  | 1  | 1  | 495 | 2  | 0 |
| c.959C>G                     | p.P320R          | MS | S5-pore-S6 | 1  | 1  | 1  | 490 | 1  | 0 |
| *** p.T322M +*** p.637fsx665 |                  | MS | S5-pore-S6 | 4  | 2  | 1  | 514 | 1  | 0 |
| c.965C>T                     | p.T322M          | MS | S5-pore-S6 | 10 | 6  | 6  | 488 | 2  | 0 |
| c.973G>A                     | p.G325R          | MS | S5-pore-S6 | 9  | 6  | 5  | 464 | 5  | 0 |
| c.974G>A                     | p.G325E          | MS | S5-pore-S6 | 2  | 2  | 1  | 490 | 2  | 0 |
| c.976A>G                     | p.K326E          | MS | S5-pore-S6 | 1  | 0  | 1  | 446 | 1  | 0 |
| c.1016T>C                    | p.F339S          | MS | S5-pore-S6 | 3  | 2  | 2  | 466 | 0  | 0 |
| c.1017-1019del               | CTT p. 340del F  | MS | S5-pore-S6 | 5  | 4  | 2  | 564 | 2  | 0 |
| c.1022C>T                    | p.A341V          | MS | S5-pore-S6 | 35 | 20 | 11 | 500 | 23 | 7 |
| c.1022C>A                    | p.A341E          | MS | S5-pore-S6 | 1  | 0  | 1  | 480 | 0  | 0 |
| c.1028C>T                    | p.P343L          | MS | S5-pore-S6 | 2  | 1  | 2  | 571 | 2  | 1 |
| c.1031C>A                    | p.A344E          | MS | S5-pore-S6 | 20 | 14 | 11 | 496 | 2  | 2 |
| c.1031C>T                    | p.A344V          | MS | S5-pore-S6 | 1  | 1  | 1  | 480 | 1  | 0 |
| c.1032 G>A                   | p.A344A splicing | MS | S5-pore-S6 | 47 | 26 | 24 | 494 | 23 | 4 |
| c.1040T>G                    | p.L347R          | MS | S5-pore-S6 | 1  | 1  | 1  | 487 | 0  | 0 |
| ***** p.K358_Q359del         |                  | C  | N/C-term   | 2  | 1  | 1  | 493 | 1  | 0 |
| ***** p.Q361_K362 ins RQ     |                  | C  | N/C-term   | 1  | 1  | 1  | 470 | 1  | 0 |
| c.1096C>T                    | p.R366W          | C  | N/C-term   | 13 | 6  | 8  | 488 | 3  | 0 |
| c.1097G>C                    | p.R366P          | C  | N/C-term   | 4  | 2  | 2  | 525 | 3  | 0 |
| c.1097G>A                    | p.R366Q          | C  | N/C-term   | 2  | 2  | 2  | 454 | 0  | 0 |
| c.1111 G>A                   | p.A371T          | C  | N/C-term   | 1  | 1  | 1  | 460 | 0  | 0 |
| p.G417A                      | splicing error   | C  | N/C-term   | 1  | 1  | 1  | 481 | 1  | 0 |
| c.1265A>C                    | p.K422T          | C  | N/C-term   | 3  | 3  | 2  | 519 | 0  | 0 |
| c.1309A>G                    | p.M437V          | C  | N/C-term   | 3  | 2  | 1  | 380 | 0  | 0 |
| c.1352G>A                    | p.R451Q          | C  | N/C-term   | 1  | 0  | 1  | 440 | 1  | 1 |
| c.1382-1383ins A             | p.T461X          | C  | N/C-term   | 1  | 1  | 1  | 480 | 1  | 0 |
| c.1550T>C                    | p.I 517T         | C  | N/C-term   | 3  | 1  | 1  | 410 | 1  | 0 |
| c.1552C>G                    | p.R518G          | C  | N/C-term   | 6  | 4  | 4  | 443 | 4  | 0 |
| c.1552C>T                    | p.R518X          | C  | N/C-term   | 1  | 0  | 1  | 453 | 0  | 0 |
| c.1556G>A                    | p.R519H          | C  | N/C-term   | 1  | 0  | 1  | 400 | 1  | 1 |
| ***** p.Q521-Y522 del T      |                  | C  | N/C-term   | 1  | 1  | 1  | 448 | 0  | 0 |

|              |                |   |          |    |    |    |     |    |   |
|--------------|----------------|---|----------|----|----|----|-----|----|---|
| c.1574C>T    | p.A525V        | C | N/C-term | 13 | 5  | 10 | 494 | 6  | 0 |
| c.1615C>T    | p.R539W        | C | N/C-term | 3  | 1  | 3  | 464 | 1  | 0 |
| c.1634A>G    | p.Y545C        | C | N/C-term | 4  | 3  | 2  | 487 | 0  | 0 |
| c.1661T>G    | p.V554G        | C | N/C-term | 1  | 1  | 1  | 523 | 0  | 0 |
| c.1663C>T    | p.R555C        | C | N/C-term | 6  | 2  | 2  | 454 | 1  | 0 |
| c.1664G>A    | p.R555H        | C | N/C-term | 1  | 1  | 1  | 431 | 0  | 0 |
| c.1667T>A    | p.I556N        | C | N/C-term | 1  | 1  | 1  | 490 | 0  | 0 |
| c.1679A>T    | p.Q560L        | C | N/C-term | 1  | 1  | 1  | 481 | 0  | 0 |
| c.1683G>T    | p.R561S        | C | N/C-term | 3  | 2  | 0  |     | 1  | 0 |
| c.1700T>C    | p.I567T        | C | N/C-term | 1  | 0  | 1  | 604 | 0  | 0 |
| c.1714delC   | p.L572fsx592   | C | N/C-term | 4  | 2  | 2  | 461 | 1  | 1 |
| c.1719C>A    | p.F573L        | C | N/C-term | 1  | 1  | 1  | 440 | 0  | 0 |
| c.1760C>T    | p.T587M        | C | N/C-term | 39 | 26 | 19 | 492 | 20 | 3 |
| c.1772G>A    | p.R591H        | C | N/C-term | 13 | 8  | 7  | 479 | 3  | 0 |
| c.1781G>A    | p.R594Q        | C | N/C-term | 6  | 3  | 3  | 474 | 0  | 0 |
| c.1793A>G    | p.K598R        | C | N/C-term | 1  | 1  | 1  | 402 | 0  | 0 |
| c.1805T>C    | p.L602P        | C | N/C-term | 1  | 1  | 0  |     | 0  | 0 |
| c.1807 del G | p.D603fsX665   | C | N/C-term | 1  | 0  | 1  | 447 | 0  | 0 |
| c.1831G>T    | p.D611Y        | C | N/C-term | 19 | 9  | 6  | 510 | 5  | 1 |
| c.1893delC   | p.P631fsX664   | C | N/C-term | 3  | 2  | 0  |     | 0  | 0 |
| c.1128+1G>A  | Splicing Error |   |          | 4  | 4  | 3  | 469 | 1  | 0 |
| c.1514+1G>A  | Splicing Error |   |          | 1  | 1  | 1  | 496 | 0  | 0 |
| c.1732+2T>C  | Splicing Error |   |          | 3  | 1  | 2  | 458 | 1  | 0 |

N: N-terminus, C: C-terminus, TM: transmembrane, MS: membrane spanning, CA/VF:cardiac arrest/ ventricular fibrillation

\*c.533-565del CCGGCTGCCGCAGCAAGTACGTGGGCCTCTGGG

\*\* c.743G>T(homo) c.744G>C(homo)

\*\*\* c.965C>T

\*\*\*\* c.1909delC

\*\*\*\*\* c.1073\_1078 del AGCAGA

\*\*\*\*\* c.1084\_1085 ins GGCAGA

\*\*\*\*\*c.1561-1564 del CAGTinsC

eTable 2. LQT2 Mutations or Rare Variants

| Mutation                                 | site | Site     | N | Female<br>(n) | Proband<br>(n) | Mean QTc<br>(proband) | Syncop<br>e (n) | CAV<br>F (n) |
|------------------------------------------|------|----------|---|---------------|----------------|-----------------------|-----------------|--------------|
| c.58C>G p.R20G                           | N    | N/C-term | 1 | 0             | 1              | 490                   | 0               | 0            |
| c.59G>T p.R20L                           | N    | N/C-term | 3 | 2             | 1              | 490                   | 0               | 0            |
| c.65T>A p.F22Y                           | N    | N/C-term | 1 | 0             | 1              | 558                   | 1               | 1            |
| c.80G>C p.R27P                           | N    | N/C-term | 1 | 0             | 1              | 496                   | 0               | 0            |
| c.100delG p.A34fsX59                     | N    | N/C-term | 1 | 1             | 1              | 574                   | 1               | 1            |
| c.122 T>C p.V41A                         | N    | N/C-term | 1 | 0             | 1              | 451                   | 0               | 0            |
| c.127T>G p.Y43D                          | N    | N/C-term | 3 | 2             | 1              | 480                   | 1               | 0            |
| c.133A>G p.N45D                          | N    | N/C-term | 2 | 0             | 0              |                       | 0               | 0            |
| c.139G>T p.G47C                          | N    | N/C-term | 2 | 0             | 2              | 513                   | 0               | 0            |
| c.148delG p.E50fsX59                     | N    | N/C-term | 1 | 0             | 1              | 478                   | 1               | 0            |
| c.157G>A p.G53S                          | N    | N/C-term | 6 | 3             | 3              | 538                   | 1               | 1            |
| c.157G>A p.G53R                          | N    | N/C-term | 1 | 1             | 1              | 460                   | 1               | 1            |
| c.164C>T p.S55L                          | N    | N/C-term | 1 | 1             | 1              | 474                   | 1               | 0            |
| c.172G>A p.E58K                          | N    | N/C-term | 3 | 3             | 2              | 462                   | 3               | 1            |
| c.179T>C p.M60T                          | N    | N/C-term | 1 | 1             | 1              | 480                   | 1               | 0            |
| c.193A>C p.T65P                          | N    | N/C-term | 5 | 5             | 3              | 525                   | 3               | 2            |
| c.196T>C p.C66R                          | N    | N/C-term | 1 | 1             | 1              | 517                   | 1               | 0            |
| c.211G>A p.G71R                          | N    | N/C-term | 2 | 2             | 2              | 533                   | 2               | 1            |
| c.215C>A p.P72Q                          | N    | N/C-term | 2 | 2             | 1              | 508                   | 1               | 0            |
| c.233C>T p.A78V                          | N    | N/C-term | 1 | 0             | 1              | 470                   | 0               | 0            |
| c.232G>A p.A78T                          | N    | N/C-term | 1 | 0             | 1              | 520                   | 0               | 0            |
| c.252-253ins <sup>*1</sup> p.82-84insIAQ | N    | N/C-term | 1 | 1             | 1              | 536                   | 1               | 0            |
| c.318C>A p.F106L                         | N    | N/C-term | 1 | 1             | 1              | 520                   | 1               | 0            |
| c.316T>G p.F106V                         | N    | N/C-term | 2 | 2             | 1              | 510                   | 2               | 0            |
| c.332A>T p.D111V                         | N    | N/C-term | 3 | 3             | 1              | 416                   | 1               | 0            |
| c.340C>T p.P114S                         | N    | N/C-term | 8 | 4             | 2              | 513                   | 2               | 0            |
| c.343G>A p.V115M                         | N    | N/C-term | 2 | 1             | 1              | 458                   | 1               | 0            |
| c.371T>C p.M124T                         | N    | N/C-term | 6 | 4             | 1              | 480                   | 2               | 0            |
| c.388G>A p.E130K                         | N    | N/C-term | 3 | 1             | 2              | 483                   | 0               | 0            |
| c.437 del A p.N146fsX165                 | N    | N/C-term | 1 | 1             | 1              | 506                   | 0               | 0            |
| c.453-454insC p.P151fsX330               | N    | N/C-term | 1 | 1             | 1              | 466                   | 1               | 1            |
| c.453 del C p.P151fsX165                 | N    | N/C-term | 1 | 1             | 1              | 495                   | 1               | 1            |
| exon3 c.454inC p.H152 fsX331             | N    | N/C-term | 2 | 2             | 1              | 542                   | 0               | 0            |
| c.453delC p.T152fsX165                   | N    | N/C-term | 2 | 2             | 1              | 530                   | 1               | 0            |
| c.486-487delCT p.T162fsX330              | N    | N/C-term | 2 | 0             | 1              | 490                   | 1               | 0            |
| c.527insC p.R176fsX331                   | N    | N/C-term | 1 | 1             | 1              | 474                   | 1               | 1            |
| c.547-533del <sup>*2</sup> p.G183fsX198  | N    | N/C-term | 1 | 0             | 1              | 482                   | 0               | 0            |

|                                                               |    |             |        |   |   |     |   |   |
|---------------------------------------------------------------|----|-------------|--------|---|---|-----|---|---|
| c.560-568del * <sup>3</sup> p.G187-A190del                    | N  | N/C-term    | 3      | 2 | 1 | 548 | 1 | 0 |
| c.589G>T p.D197Y                                              | N  | N/C-term    | 4      | 1 | 1 | 542 | 1 | 1 |
| c.715_719 del TCTCC p.S239fsX329                              | N  | N/C-term    | 1<br>4 | 8 | 4 | 477 | 2 | 1 |
| c.724del C p.R242fsX359                                       | N  | N/C-term    | 4      | 4 | 1 | 464 | 1 | 0 |
| c.730~742del * <sup>4</sup> p.243fsX355                       | N  | N/C-term    | 1      | 1 | 1 | 436 | 1 | 0 |
| c.760-775del * <sup>5</sup> p.H254fsX354                      | N  | N/C-term    | 2      | 2 | 1 | 520 | 1 | 1 |
| c.804C>T p.R269W                                              | N  | N/C-term    | 1      | 1 | 1 | 427 | 0 | 0 |
| p.H302fsX339                                                  | N  | N/C-term    | 2      | 0 | 1 | 472 | 1 | 0 |
| c.929-930insC p.P310fsX331                                    | N  | N/C-term    | 1      | 1 | 1 | 475 | 1 | 1 |
| c. 1000-1020 del p. R312-S318 del                             | N  | N/C-term    | 2      | 2 | 1 | 505 | 1 | 0 |
| c.934C>T p.R312C                                              | N  | N/C-term    | 3      | 2 | 1 | 517 | 0 | 0 |
| c. 959 C>T p. S320L                                           | N  | N/C-term    | 1      | 1 | 1 | 467 | 1 | 0 |
| c. 1001C>T p. P334L                                           | N  | N/C-term    | 2      | 2 | 2 | 536 | 2 | 0 |
| c.1003C>T p.Q335X                                             | N  | N/C-term    | 3      | 2 | 1 | 481 | 2 | 0 |
| c. 1025 A>T p. D342V                                          | N  | N/C-term    | 1      | 1 | 1 | 475 | 1 | 0 |
| c.1091-1102del* <sup>6</sup> ins53* <sup>7</sup> p.K364fsX366 | N  | N/C-term    | 7      | 3 | 2 | 491 | 2 | 1 |
| c.1171c>T p.Q391X                                             | N  | N/C-term    | 2      | 1 | 1 | 540 | 1 | 0 |
| c.1190_1191 del GC p.R397fsX517                               | N  | N/C-term    | 1      | 1 | 1 | 480 | 1 | 1 |
| c.1193G>A p.W398X                                             | N  | N/C-term    | 3      | 2 | 1 | 541 | 1 | 1 |
| c.1205A>G p.H402R                                             | TM | non-pore MS | 3      | 1 | 2 | 488 | 2 | 1 |
| c.1277C>A p.P426H                                             | TM | non-pore MS | 3      | 1 | 1 | 597 | 1 | 0 |
| c.1280A>G p.Y427C                                             | TM | non-pore MS | 2      | 1 | 1 | 470 | 0 | 0 |
| c.1283C>T p.S428L                                             | TM | non-pore MS | 1      | 0 | 1 | 450 | 0 | 0 |
| c.1401-1402ins * <sup>8</sup> p.I467 L468insMFIVDI            | TM | non-pore MS | 1      | 1 | 1 | 566 | 0 | 0 |
| c.1403T>G p.L468R                                             | TM | non-pore MS | 1      | 1 | 1 | 594 | 0 | 0 |
| c.1403 ins C p.L468fsX518                                     | TM | non-pore MS | 2      | 1 | 1 | 515 | 0 | 0 |
| c.1413delC p.F471fsX520                                       | TM | non-pore MS | 1      | 1 | 1 | 506 | 1 | 1 |
| c.1417A>C p.T473P                                             | TM | non-pore MS | 2      | 0 | 2 | 511 | 1 | 1 |
| c.1421C>T p.T474I                                             | TM | non-pore MS | 4      | 1 | 1 | 509 | 3 | 0 |
| c.1454_1455 ins * <sup>9</sup> p.H485fsX524                   | TM | non-pore MS | 3      | 2 | 2 | 484 | 2 | 0 |
| c.1465A>T p.I489F                                             | TM | non-pore MS | 1      | 0 | 1 | 443 | 1 | 0 |
| c. 1468 G>A p. A490T                                          | TM | non-pore MS | 1      | 1 | 1 | 549 | 1 | 0 |
| c.1474C>T p.H492Y                                             | TM | non-pore MS | 8      | 7 | 4 | 495 | 4 | 1 |
| c.1478A>G p.Y493C                                             | TM | non-pore MS | 1      | 0 | 1 | 529 | 0 | 0 |
| c.1483_1484 del AA p.K495fsX517                               | TM | non-pore MS | 2      | 2 | 1 | 491 | 0 | 0 |
| c.1491G>A p. W497X                                            | TM | non-pore MS | 3      | 2 | 1 | 500 | 1 | 0 |
| c.1501G>A p.D501N                                             | TM | non-pore MS | 1      | 0 | 1 | 548 | 1 | 0 |
| c.1511C>T p.A504V                                             | TM | non-pore MS | 2      | 1 | 1 | 492 | 1 | 1 |

|                    |               |      |             |   |   |   |     |   |   |
|--------------------|---------------|------|-------------|---|---|---|-----|---|---|
| c.1520C>T          | p.P507L       | TM   | non-pore MS | 1 | 1 | 1 | 536 | 1 | 1 |
| c.1582C>T          | p.R528W       | TM   | non-pore MS | 1 | 0 | 1 | 454 | 0 | 0 |
| c.1600C>T          | p.R534C       | TM   | non-pore MS | 1 | 3 | 5 | 484 | 4 | 1 |
|                    |               |      |             | 1 |   |   |     |   |   |
| c.1607_1608 del CG | p.A536fsX653  | TM   | non-pore MS | 1 | 1 | 1 | 558 | 1 | 0 |
| c.1682C>T          | p.A561V       | S5   | S5-pore-S6  | 7 | 5 | 5 | 545 | 6 | 2 |
| c.1681G>A          | p.A561T       | S5   | S5-pore-S6  | 1 | 1 | 1 | 503 | 0 | 0 |
| c.1682-1683insAGC  | p.561-562insA | S5   | S5-pore-S6  | 1 | 0 | 1 | 601 | 1 | 1 |
| c.1686 C>G         | p.H562Q       | S5   | S5-pore-S6  | 2 | 2 | 1 | 459 | 0 | 0 |
| c.1685A>G          | p.H562R       | S5   | S5-pore-S6  | 1 | 0 | 1 | 555 | 0 | 0 |
| c.1687T>G          | p.W563G       | S5   | S5-pore-S6  | 2 | 2 | 1 | 475 | 2 | 0 |
| c.1689G>T          | p.W563C       | S5   | S5-pore-S6  | 2 | 1 | 1 | 460 | 1 | 0 |
| c.1697G            | p.C566F       | S5   | S5-pore-S6  | 1 | 1 | 1 | 524 | 1 | 0 |
| c.1714G>T          | p.G572C       | pore | S5-pore-S6  | 1 | 1 | 1 | 500 | 1 | 0 |
| c.1714G>A          | p.G572S       | pore | S5-pore-S6  | 9 | 5 | 5 | 496 | 5 | 2 |
| c.1715G>A          | p.G572D       | pore | S5-pore-S6  | 3 | 2 | 2 | 493 | 1 | 0 |
| c.1720A>G          | p.M574V       | pore | S5-pore-S6  | 3 | 3 | 1 | 519 | 1 | 1 |
| c.1736T>C          | p.M579T       | pore | S5-pore-S6  | 3 | 1 | 1 |     | 0 | 0 |
| c.1744 C>T         | p.R582C       | pore | S5-pore-S6  | 5 | 2 | 3 | 490 | 2 | 1 |
| c.1745 G>T         | p.R582L       | pore | S5-pore-S6  | 2 | 1 | 1 | 510 | 1 | 0 |
| c.1750G>T          | p.G584C       | pore | S5-pore-S6  | 5 | 4 | 2 | 510 | 2 | 1 |
| c.1769G>T          | p.G590V       | pore | S5-pore-S6  | 3 | 2 | 1 | 435 | 1 | 0 |
| c.1769G>A          | p.G590D       | pore | S5-pore-S6  | 1 | 1 | 1 | 548 | 1 | 0 |
| c.1775 del A       | p.Q592fsX593  | pore | S5-pore-S6  | 6 | 2 | 2 | 528 | 4 | 1 |
| c.1777A>G          | p.I593V       | pore | S5-pore-S6  | 2 | 1 | 1 | 495 | 0 | 0 |
| c.1785A>T          | p.K595N       | pore | S5-pore-S6  | 2 | 1 | 1 | 506 | 1 | 1 |
| c.1783 A>G         | p.K595E       | pore | S5-pore-S6  | 2 | 2 | 1 | 474 | 1 | 0 |
| c.1790A>G          | p.Y597C       | pore | S5-pore-S6  | 3 | 1 | 1 | 469 | 1 | 0 |
| c.1801 C>A         | p.G601S       | pore | S5-pore-S6  | 8 | 6 | 4 | 479 | 3 | 0 |
| c.1802G>A          | p.G601D       | pore | S5-pore-S6  | 2 | 2 | 1 | 424 | 2 | 1 |
| c.1808G>A          | p.G603D       | pore | S5-pore-S6  | 3 | 2 | 1 | 445 | 2 | 1 |
| c.1811G>A          | p.G604D       | pore | S5-pore-S6  | 1 | 1 | 1 | 521 | 1 | 1 |
| c.1810 G>A         | p.G604S       | pore | S5-pore-S6  | 3 | 1 | 3 | 506 | 3 | 2 |
| c.1814C>T          | p.P605L       | pore | S5-pore-S6  | 1 | 1 | 1 | 502 | 1 | 0 |
| c.1816 T>C         | p.S606P       | pore | S5-pore-S6  | 1 | 1 | 1 | 269 | 1 | 0 |
| c.1831 T>G         | p.Y611D       | pore | S5-pore-S6  | 1 | 0 | 1 | 524 | 1 | 1 |
| c.1838C>T          | p.T613M       | pore | S5-pore-S6  | 5 | 3 | 4 | 528 | 3 | 1 |
| c.1840G>A          | p.A614T       | pore | S5-pore-S6  | 3 | 2 | 1 | 553 | 1 | 0 |
| c.1841C>T          | p.A614V       | pore | S5-pore-S6  | 6 | 5 | 5 | 496 | 6 | 1 |
| c.1843C>T          | p.L615F       | pore | S5-pore-S6  | 2 | 2 | 1 | 448 | 1 | 0 |



|                      |               |      |            |   |   |   |     |   |   |
|----------------------|---------------|------|------------|---|---|---|-----|---|---|
| c.1847A>C            | p.Y616S       | pore | S5-pore-S6 | 3 | 1 | 1 | 520 | 3 | 0 |
| c.1849T>C            | p.F617L       | pore | S5-pore-S6 | 3 | 1 | 2 | 505 | 2 | 1 |
| c.1853C>G            | p.T618S       | pore | S5-pore-S6 | 6 | 3 | 3 | 497 | 2 | 0 |
| c.1868C>T            | p.T623I       | pore | S5-pore-S6 | 2 | 2 | 1 | 604 | 1 | 0 |
| c.1882G>A            | p.G628S       | pore | S5-pore-S6 | 5 | 2 | 4 | 603 | 3 | 2 |
| c.1882G>C            | p.G628R       | pore | S5-pore-S6 | 1 | 1 | 1 | 542 | 1 | 1 |
| c.1886A>G            | p.N629S       | pore | S5-pore-S6 | 4 | 4 | 1 | 500 | 1 | 1 |
| c.1887 C>A           | p. N629K      | pore | S5-pore-S6 | 1 | 1 | 1 | 596 | 1 | 0 |
| c.888G>C             | p.V630L       | pore | S5-pore-S6 | 1 | 0 | 1 | 577 | 1 | 0 |
| c.1892C>T            | p.S631F       | pore | S5-pore-S6 | 1 | 1 | 1 | 576 | 1 | 0 |
| c.1894C>T            | p.P632S       | pore | S5-pore-S6 | 1 | 1 | 1 | 512 | 1 | 0 |
| c.1898A>T            | p.N633I       | pore | S5-pore-S6 | 3 | 3 | 1 | 493 | 2 | 0 |
| c.1898A>G            | p.N633S       | pore | S5-pore-S6 | 1 | 1 | 1 | 535 | 1 | 0 |
| c.1899C>A            | p.N633K       | pore | S5-pore-S6 | 1 | 0 | 1 | 490 | 0 | 0 |
| c.1900A>T            | p.T634S       | pore | S5-pore-S6 | 1 | 1 | 1 | 565 | 0 | 0 |
| c.1900A>G            | p.T634A       | pore | S5-pore-S6 | 1 | 1 | 1 | 510 | 1 | 0 |
| c.1909G>A            | p.E637K       | S6   | S5-pore-S6 | 3 | 2 | 1 | 469 | 2 | 0 |
| c.1908-1909delAG     | p. E637fsX653 | S6   | S5-pore-S6 | 1 | 1 | 1 | 472 | 1 | 0 |
| c.del 1913-1915      | p.K638del     | S6   | S5-pore-S6 | 4 | 2 | 3 | 528 | 3 | 1 |
| c.1916T>A            | p.l639N       | S6   | S5-pore-S6 | 2 | 0 | 1 | 439 | 2 | 0 |
| c.1989-1991del TTC   | p. F640del    | S6   | S5-pore-S6 | 3 | 2 | 2 | 354 | 3 | 1 |
| c.1922C>T            | p. S641F      | S6   | S5-pore-S6 | 3 | 0 | 1 | 657 | 1 | 0 |
| c.1930G>T            | p.V644F       | S6   | S5-pore-S6 | 6 | 2 | 3 | 550 | 4 | 2 |
| c.1935G>A            | p.M645I       | S6   | S5-pore-S6 | 1 | 0 | 1 | 618 | 1 | 1 |
| c.1952T>A            | p.M651K       | S6   | S5-pore-S6 | 1 | 0 | 1 | 486 | 1 | 0 |
| c.1956C>A            | p. Y652X      | S6   | S5-pore-S6 | 1 | 0 | 1 | 540 | 1 | 0 |
| c.1970G>T            | p.G657V       | S6   | S5-pore-S6 | 1 | 1 | 1 | 512 | 1 | 0 |
| c.1969G>A            | p.G657S       | S6   | S5-pore-S6 | 1 | 1 | 1 | 450 | 1 | 0 |
| c.2062C>T            | p.Q676X       | C    | N/C-term   | 3 | 2 | 1 | 493 | 0 | 0 |
| c.2054-2055GC>CT     | p.R685P       | C    | N/C-term   | 1 | 1 | 1 | 499 | 1 | 0 |
| c.2090 del T         | p.L697fsX713  | C    | N/C-term   | 1 | 1 | 1 | 510 | 1 | 0 |
| c.2117 C>T           | p. S706F      | C    | N/C-term   | 1 | 1 | 1 | 406 | 1 | 0 |
| c.2170_2171 ins CC   | p. L724fsX733 | C    | N/C-term   | 2 | 1 | 1 | 477 | 1 | 0 |
| c.2145G>C            | p.A715A       | C    | N/C-term   | 2 | 2 | 1 | 458 | 2 | 0 |
| c.2192A>G            | p.H731R       | C    | N/C-term   | 1 | 1 | 1 | 521 | 1 | 0 |
| c.2210T>C            | p.L737P       | C    | N/C-term   | 2 | 0 | 1 | 500 | 0 | 0 |
| c.2212C>T            | p.Q738X       | C    | N/C-term   | 2 | 2 | 1 | 562 | 1 | 0 |
| c.2230C>T            | p.R744X       | C    | N/C-term   | 4 | 3 | 3 | 544 | 2 | 0 |
| c.2235-2245delinsTTT | p.G745fsX800  | C    | N/C-term   | 3 | 0 | 2 | 490 | 1 | 0 |
| c.2250C>A            | p.C750X       | C    | N/C-term   | 1 | 1 | 1 | 549 | 1 | 0 |

|                                     |   |          |   |   |   |     |   |   |
|-------------------------------------|---|----------|---|---|---|-----|---|---|
| c.2254C>T p.R752W                   | C | N/C-term | 2 | 1 | 1 | 427 | 1 | 0 |
| c. 2266C>G p. M756V                 | C | N/C-term | 1 | 0 | 1 | 453 | 1 | 0 |
| c.2311-2332delinsTC p.H771fsX796    | C | N/C-term | 3 | 3 | 1 | 495 | 0 | 0 |
| c.2354G>A p.G785D                   | C | N/C-term | 1 | 1 | 1 | 527 | 1 | 0 |
| c.2385-2387delCGT p.V796del         | C | N/C-term | 1 | 1 | 1 | 482 | 0 | 0 |
| c. 2453C>T p. S818L                 | C | N/C-term | 5 | 3 | 4 | 495 | 3 | 0 |
| c.2467C>T p.R823W                   | C | N/C-term | 3 | 3 | 1 | 482 | 2 | 0 |
| c.2477C>T p.T826I                   | C | N/C-term | 1 | 1 | 1 | 507 | 0 | 0 |
| c.2476A>G p.T826A                   | C | N/C-term | 1 | 1 | 1 | 457 | 0 | 0 |
| c.2509G>A p.D837N                   | C | N/C-term | 3 | 2 | 1 | 447 | 0 | 0 |
| c. 2536 C>A p.P846 T                | C | N/C-term | 1 | 1 | 1 | 491 | 1 | 0 |
| c. 2559del G p.W853fsX867           | C | N/C-term | 4 | 2 | 1 | 464 | 2 | 0 |
| 2587C>T p.R863X                     | C | N/C-term | 1 | 1 | 1 | 472 | 1 | 0 |
| c.2591A>G p.D864G                   | C | N/C-term | 1 | 1 | 1 | 458 | 1 | 0 |
| c.2613-2669del/ins *10 p.S871fs31X  | C | N/C-term | 2 | 2 | 1 | 506 | 2 | 0 |
| c. 2637-2638 del TG                 | C | N/C-term | 2 | 1 | 1 | 502 | 0 | 0 |
| c.2680-2681insAGGC p.R894fsX920     | C | N/C-term | 3 | 3 | 1 | 443 | 1 | 0 |
| c.2684C>T p.T895M                   | C | N/C-term | 1 | 0 | 1 | 474 | 0 | 0 |
| c.2719 2792del p.A907fsX949         | C | N/C-term | 1 | 1 | 1 | 496 | 0 | 0 |
| c.2728-2729ins*11 p.G909fsX975      | C | N/C-term | 1 | 0 | 1 | 514 | 0 | 0 |
| c.2732_2766 del *12 p.G911fsX927    | C | N/C-term | 1 | 1 | 1 | 508 | 0 | 0 |
| c.2734-2738delCGGGC p.R912 fsX917   | C | N/C-term | 4 | 1 | 2 | 495 | 1 | 0 |
| c.2737-2738ins *13 p.R912fsX975     | C | N/C-term | 2 | 2 | 1 | 511 | 1 | 0 |
| c.2768C>T p.P923L                   | C | N/C-term | 1 | 1 | 1 | 478 | 1 | 0 |
| c.2770_2771 ins T p.G924fsX939      | C | N/C-term | 1 | 1 | 1 | 502 | 1 | 1 |
| c.2775delG p.G925fsX973             | C | N/C-term | 3 | 1 | 1 | 523 | 0 | 1 |
| c.2780G>A p.W927X                   | C | N/C-term | 1 | 0 | 1 | 511 | 1 | 1 |
| c.2892-2893insC p.964fsX1118        | C | N/C-term | 2 | 1 | 1 | 442 | 0 | 0 |
| c.2901-2902ins *14 p.P967fsX975     | C | N/C-term | 2 | 1 | 1 | 461 | 0 | 0 |
| c.2918del T p.L973fsX1056           | C | N/C-term | 2 | 1 | 1 | 497 | 1 | 0 |
| c.2930G>A p.C977Y                   | C | N/C-term | 1 | 0 | 1 | 474 | 0 | 0 |
| c.2930G>C p.C977S                   | C | N/C-term | 1 | 1 | 1 | 460 | 1 | 0 |
| c.2948-2947del p.R983fsX1112        | C | N/C-term | 1 | 1 | 1 | 551 | 1 | 0 |
| c.2959_2960 del CT p.L987fsX1117    | C | N/C-term | 2 | 1 | 1 | 530 | 1 |   |
| c.2993delT p.I997fs59X              | C | N/C-term | 1 | 1 | 1 | 440 | 1 | 0 |
| c.3002del G p.W1001fsX1056          | C | N/C-term | 7 | 4 | 2 | 509 | 5 | 3 |
| c.3019delC p.R1007fsX1056           | C | N/C-term | 1 | 1 | 1 | 500 | 0 | 0 |
| c.3027C>G p.Y1009X                  | C | N/C-term | 1 | 0 | 1 | 515 | 0 | 0 |
| c.3040C>T p.R1014X                  | C | N/C-term | 1 | 1 | 1 | 480 | 1 | 0 |
| c.3090-3102 del *15 p. P1030fsX1052 | C | N/C-term | 3 | 3 | 1 | 572 | 1 | 0 |

|                                |                 |   |          |   |   |   |     |   |   |
|--------------------------------|-----------------|---|----------|---|---|---|-----|---|---|
| c.3092 del G                   | p.G1031fsX1056  | C | N/C-term | 1 | 1 | 1 | 640 | 1 | 1 |
| c.3091-3101del* <sup>16</sup>  | p.G1031fsX1114  | C | N/C-term | 2 | 2 | 1 | 525 | 1 | 0 |
| c.3093 insG                    | p.G1031fsX 1118 | C | N/C-term | 2 | 2 | 1 | 452 | 1 | 1 |
| c.3096-3109del* <sup>17</sup>  | p.R1032fsX1113  | C | N/C-term | 2 | 1 | 1 | 540 | 1 | 1 |
| c.3103delC                     | p.R1035fsX1056  | C | N/C-term | 5 | 2 | 3 | 491 | 2 | 2 |
| c.3104-3105ins CC              | p. R1035fs×1057 | C | N/C-term | 3 | 2 | 1 | 469 | 2 | 1 |
| c.3115G>T                      | p.E1039X        | C | N/C-term | 1 | 0 | 0 | 420 | 0 | 0 |
| c.3190-3199del* <sup>18</sup>  | p.L1064fsX1068  | C | N/C-term | 4 | 2 | 1 | 480 | 1 | 0 |
| c.3252-3262del* <sup>19</sup>  | p.P1084fsX1114  | C | N/C-term | 2 | 1 | 1 | 522 | 1 | 0 |
| c.3278C>T                      | p.P1093L        | C | N/C-term | 1 | 0 | 0 |     | 0 | 0 |
| c. 3430G>A                     | p A1144T        | C | N/C-term | 2 | 1 | 1 | 463 | 1 | 0 |
| c.1557+2T>G                    | Splicing Error  |   |          | 1 | 1 | 1 | 490 | 0 | 0 |
| c.2692+1G>T                    | Splicing Error  |   |          | 3 | 3 | 1 | 516 | 1 | 0 |
| c.1832_1945 del* <sup>20</sup> |                 |   |          | 2 | 1 | 1 | 580 | 1 | 0 |
| c.2966-2A>T                    | Splicing Error  |   |          | 2 | 2 | 1 | 525 | 2 | 1 |

N:N-terminus, TM: transmembrane, C: C-terminus, Abbreviations are same as Supplemental TableS1.

\*1 ATCGCGCAG

\*2 GGCGGCG

\*3 GCGCGGGCG

\*4 GCGCCCGGCCAGC

\*5 CACAGCCTCAACCCCG

\*6 AGGAGCGAACCCA

\*7 TGTCTTGAGTCTATGTCATTGTCATAGCTTGAGACATTGTCATAGCACCTAAGA

\*8 ATGTTTCATTGTGGACATC

\*9 ACGAGGAGGTGGTCAGCCA

\*10 ACGCCTG

\*11 GGGGC

\*12 GCCGGGCGGGGGCAGGGCCGAGTAGCCGGGGCCGG

\*13 CCGGG

\*14 AGCCG

\*15 GGG TCG GCG GCCC

\*16 GGTCGGCGGCC

\*17 GCG GCC CCG GGGCG

\*18 CTGCAGCTGC

\*19 GGGGCCTGGCC

\*20

ATGTGACGGCGCTCTACTTCACCTTCAGCAGCCTCACCAGTGTGGGCTTCGGCAACGTCTCTCCCAACA  
 CCAACTCAGAGAAGATCTTCTCCATCTGCGTCATGCTCATTGGCTgtgagtgtgccagggcgggcggggagagacc  
 cacggtggaggaaccaagt

eTable 3. LQT3 Mutations or Rare Variants

| Mutation or rare variant                        | location | S5-<br>pore-S6 | N  | female<br>(n) | Proba<br>nd (n) | QTc mean<br>(proband) | sync<br>ope<br>(n) | CA/<br>VF<br>(n) | Other<br>phenotypes<br>(n) |
|-------------------------------------------------|----------|----------------|----|---------------|-----------------|-----------------------|--------------------|------------------|----------------------------|
| c.337G>A p.V113I                                | N        |                | 1  | 1             | 1               | 496                   | 0                  | 0                |                            |
| c.1231G>A p.V411M                               | DI       | S5-S6          | 7  | 4             | 3               | 555                   | 5                  | 4                | AT (1)                     |
| c.1273 G>A p.A425T                              | DI-DII   |                | 1  | 1             | 1               | 470                   | 1                  | 0                |                            |
| c.1603C>T, p.R533X                              | DI-DII   |                | 2  | 2             | 1               |                       | 2                  | 0                | SSS (1)                    |
| c.2335C>A p.Q779K                               | DII      |                | 3  | 0             | 2               | 506                   | 2                  | 0                |                            |
| c.2441G>A p.R814Q                               | DII      |                | 3  | 2             | 1               | 463                   | 0                  | 0                |                            |
| c.2497G>A p.G833R                               | DII      |                | 4  | 3             | 2               | 464                   | 2                  | 0                | AVB (1)                    |
| c.2923C>T p.R975W                               | DII-DIII |                | 1  | 1             | 0               |                       | 0                  | 0                |                            |
| c. 3067 C>T, R1023C                             | DII-DIII |                | 1  | 0             | 1               | 458                   | 1                  | 0                |                            |
| c.3292G>T p.V1098L                              | DII-DIII |                | 3  | 1             | 1               | 439                   | 0                  | 0                |                            |
| c.3988G>A p.A1330T                              | DIII     |                | 2  | 2             | 1               | 447                   | 0                  | 0                |                            |
| c.3995C>T p.P1332L                              | DIII     |                | 2  | 1             | 2               | 520                   | 2                  | 1                |                            |
| c.4282G>T p.A1428S                              | DIII     | S5-S6          | 3  | 2             | 1               | 474                   | 1                  | 0                |                            |
| c.4396A>T p.I1466F                              | DIII     | S5-S6          | 1  | 0             | 1               | 490                   | 1                  | 1                |                            |
| c.4490T>C p.M1498T                              | DIII-DIV |                | 1  | 0             | 1               | 548                   | 0                  | 0                |                            |
| c.4513-4521 dup CAGAAGCCC,<br>p.K1505-Q1507dup  | DIII-DIV |                | 1  | 1             | 1               | 602                   | 1                  | 1                | SSS (1)                    |
| c.4519-4527del CAGAAGCCC<br>p.Q1507-p1509del    | DIII-DIV |                | 3  | 1             | 3               | 550                   | 2                  | 0                |                            |
| c.4527-4528ins CAGAAGCCC<br>p.P1509-I1510insQKP | DIII-DIV |                | 1  | 1             | 1               | 470                   | 1                  | 1                | AF,SSS (1)                 |
| c.4850-4852del TCT p.F1616del                   | DIV      |                | 4  | 3             | 1               | 480                   | 1                  | 0                | SSS (1)                    |
| c.4892G>A p.G1631D                              | DIV      |                | 1  | 0             | 1               | 553                   | 1                  | 1                |                            |
| c.4931G>A p.R1644H                              | DIV      |                | 3  | 2             | 2               | 502                   | 0                  | 0                |                            |
| c.4937T>G p.L1646R                              | DIV      |                | 1  | 0             | 1               | 456                   | 0                  | 0                |                            |
| c.5236G>A p.A1746T                              | DIV      | S5-S6          | 4  | 1             | 1               | 481                   | 1                  | 1                | BrS (1)                    |
| c.5284-5286del ATC p.I1762del                   | DIV      | S5-S6          | 1  | 0             | 1               | 550                   | 1                  | 1                |                            |
| c.5287G>A p.V1763M                              | DIV      | S5-S6          | 3  | 2             | 2               | 507                   | 3                  | 2                | AVB (1)                    |
| c.5313C>G p. I1771M                             | DIV      | S5-S6          | 1  | 1             | 1               | 580                   | 1                  |                  |                            |
| c.5314C>G p.L1772V                              | DIV      | S5-S6          | 1  | 0             | 1               | 542                   | 1                  | 1                | AVB (1)                    |
| c.5319A>G p.N1774D                              | C        |                | 1  | 0             | 1               | 582                   | 1                  | 1                | AVB (1)                    |
| c.5348C>A p.T1783N                              | C        |                | 2  | 1             | 1               | 476                   | 1                  | 0                |                            |
| c.5350G>A p.E1784K                              | C        |                | 50 | 23            | 26              | 481                   | 5                  | 0                | BrS(7),AF(1)<br>SSS (6)    |
| c.5357T>G p.L1786R                              | C        |                | 1  | 0             | 1               |                       | 0                  | 0                | BrS (1)                    |
| c.5384A>G p.Y1795C                              | C        |                | 1  | 0             | 1               | 535                   | 0                  | 0                | AF (1)                     |

|           |           |   |  |   |   |   |     |   |   |         |
|-----------|-----------|---|--|---|---|---|-----|---|---|---------|
| c.5474T>C | p.L1825 P | C |  | 2 | 2 | 2 | 428 | 2 | 0 | SSS (1) |
|-----------|-----------|---|--|---|---|---|-----|---|---|---------|

AF: atrial fibrillation, SSS: sick sinus syndrome, AVB: atrial-ventricular block, BrS: Brugada syndrome

**eTable 4. SCN5A Mutations/Variants in Japanese LQTS Registry**

| Mutation or rare variant | location | S5-<br>pore-<br>S6 | N | Clinical Significance<br>(ClinVar)                         | Conditions<br>(ClinVar)     | J- BrS<br>registry * | Polyphen2  | Score | RS#         | MAF<br>(ExAC) | MAF<br>(HGVD) |
|--------------------------|----------|--------------------|---|------------------------------------------------------------|-----------------------------|----------------------|------------|-------|-------------|---------------|---------------|
| c.337G>A p.V113I         | N        |                    | 1 | not provided                                               |                             |                      | Benign     | 0.000 | rs199473555 | n/a           | n/a           |
| c.1231G>A p.V411M        | DI       | S5-S6              | 7 | Pathogenic (8)                                             | LQT(5), BrS(1)<br>Others(2) |                      | Probably D | 1.000 | rs72549410  | n/a           | n/a           |
| c.1273 G>A p.A425T       | DI-DII   |                    | 1 | Likely pathogenic                                          | not provided                |                      | Probably D | 0.985 | rs761117662 | 0.000008      | 0.0004        |
| c.1603C>T, p.R533X       | DI-DII   |                    | 2 | -                                                          |                             |                      | -          |       | -           | n/a           | n/a           |
| c.2335C>A p.Q779K        | DII      |                    | 3 | not provided                                               | LQT(1)                      | yes                  | Benign     | 0.005 | rs199473583 | n/a           | n/a           |
| c.2441G>A p.R814Q        | DII      |                    | 3 | Likely pathogenic (2);<br>Pathogenic (1);<br>Uncertain (2) | BrS(4),<br>Others(2)        | yes                  | Probably D | 0.999 | rs199473584 | 0.00002       | n/a           |
| c.2497G>A p.G833R        | DII      |                    | 4 | Uncertain (5)                                              | LQT(2), BrS(1)              |                      | Probably D | 1.000 | rs45475899  | 0.00017       | 0.0008        |
| c.2923C>T p.R975W        | DII-DIII |                    | 1 | Uncertain (2)                                              | BrS(1)                      |                      | Probably D | 1.000 | rs41311135  | 0.00002       | n/a           |
| c. 3067 C>T, p.R1023C    | DII-DIII |                    | 1 | -                                                          |                             |                      | Probably D | 0.996 | -           | 0.000025      | n/a           |
| c.3292G>T p.V1098L       | DII-DIII |                    | 3 | Likely benign (2)                                          | BrS(1)                      |                      | Benign     | 0.021 | rs199473191 | 0.00015       | n/a           |
| c.3988G>A p.A1330T       | DIII     |                    | 2 | Pathogenic / Likely<br>pathogenic (4)                      | LQT(1),<br>Others(2)        |                      | Probably D | 1.000 | rs199473224 | n/a           | n/a           |
| c.3995C>T p.P1332L       | DIII     | S5-S6              | 2 | Pathogenic (3)                                             | BrS(2)                      |                      | Probably D | 1.000 | rs199473225 | n/a           | n/a           |
| c.4282G>T p.A1428S       | DIII     | S5-S6              | 3 | Likely pathogenic (1);<br>Uncertain (2)                    | BrS(1)                      | yes                  | Probably D | 1.000 | rs200034939 | 0.000025      | n/a           |
| c.4396A>T p.I1466F       | DIII     | S5-S6              | 1 | -                                                          |                             |                      | Possibly D | 0.945 | -           | n/a           | n/a           |
| c.4490T>C p.M1498T       | DIII-DIV |                    | 1 | Likely pathogenic (2);<br>Uncertain (1)                    | LQT(1), BrS(1)<br>Others(1) |                      | Probably D | 0.998 | rs199473263 | n/a           | n/a           |

|                                                 |          |       |    |                                     |                             |     |            |       |             |          |     |     |
|-------------------------------------------------|----------|-------|----|-------------------------------------|-----------------------------|-----|------------|-------|-------------|----------|-----|-----|
| c.4513-4521 dup CAGAAGCCC,<br>p.K1505-Q1507dup  | DIII-DIV |       | 1  | -                                   |                             |     |            |       |             | -        | n/a | n/a |
| c.4519-4527del CAGAAGCCC<br>p.Q1507-P1509del    | DIII-DIV |       | 3  | Pathogenic/Likely<br>pathogenic (3) | LQT(1), BrS(1)              |     |            |       | rs397514251 |          | n/a | n/a |
| c.4527-4528ins CAGAAGCCC<br>p.P1509-I1510insQKP | DIII-DIV |       | 1  | -                                   |                             |     |            |       |             |          | n/a | n/a |
| c.4850-4852del TCT<br>p.F1616del                | DIV      |       | 4  | -                                   |                             |     |            |       |             |          | n/a | n/a |
| c.4892G>A p.G1631D                              | DIV      |       | 1  | not provided                        | LQT(1)                      |     | Possibly D | 0.954 | rs199473285 |          | n/a | n/a |
| c.4931G>A p.R1644H                              | DIV      |       | 3  | Pathogenic (7)                      | LQT(4), BrS(1)<br>Others(1) | yes | Probably D | 0.995 | rs28937316  | 0.000008 | n/a | n/a |
| c.4937T>G p.L1646R                              | DIV      |       | 1  | -                                   |                             |     | Probably D | 1.000 |             |          | n/a | n/a |
| c.5236G>A p.A1746T                              | DIV      | S5-S6 | 4  | not provided                        | LQT(1)                      |     | Possibly D | 0.592 | rs199473306 |          | n/a | n/a |
| c.5284-5286del ATC<br>p.I1762del                | DIV      | S5-S6 | 1  | -                                   |                             |     |            |       |             |          | n/a | n/a |
| c.5287G>A p.V1763M                              | DIV      | S5-S6 | 3  | Pathogenic (2)                      | LQT(1)                      |     | Probably D | 0.999 | rs199473631 |          | n/a | n/a |
| c.5313C>G p.I1771M                              | DIV      | S5-S6 | 1  | -                                   |                             |     | Probably D | 1.000 |             |          | n/a | n/a |
| c.5314C>G p.L1772V                              | DIV      | S5-S6 | 1  | not provided                        | LQT(1)                      |     | Probably D | 0.999 | rs199473312 |          | n/a | n/a |
| c.5319A>G p.N1774D                              | C        |       | 1  | not provided                        | LQT(1)                      |     | Probably D | 0.998 | rs199473633 |          | n/a | n/a |
| c.5348C>A p.T1783N                              | C        |       | 2  | -                                   |                             |     | Benign     | 0.449 |             |          | n/a | n/a |
| c.5350G>A p.E1784K                              | C        |       | 50 | Pathogenic (13)                     | LQT(4), BrS(4)<br>SSS(1),   | yes | Possibly D | 0.820 | rs137854601 | 0.00000  | n/a | n/a |
| c.5357T>G p.L1786R                              | C        |       | 1  | -                                   |                             |     | Probably D | 1.000 |             |          | n/a | n/a |
| c.5384A>G p.Y1795C                              | C        |       | 1  | -                                   |                             |     | Probably D | 1.000 |             |          | n/a | n/a |
| c.5474T>C p.L1825 P                             | C        |       | 2  | not provided                        | LQT(1)                      |     | Probably D | 1.000 | rs79299226  |          | n/a | n/a |

( ) number of subject, Uncertain = uncertain significance, D= damaging

J-BrS : Japanese Brugada syndrome registry (Yamagata K, et al.. Circulation. 2017 Jun 6;135(23):2255-2270.)



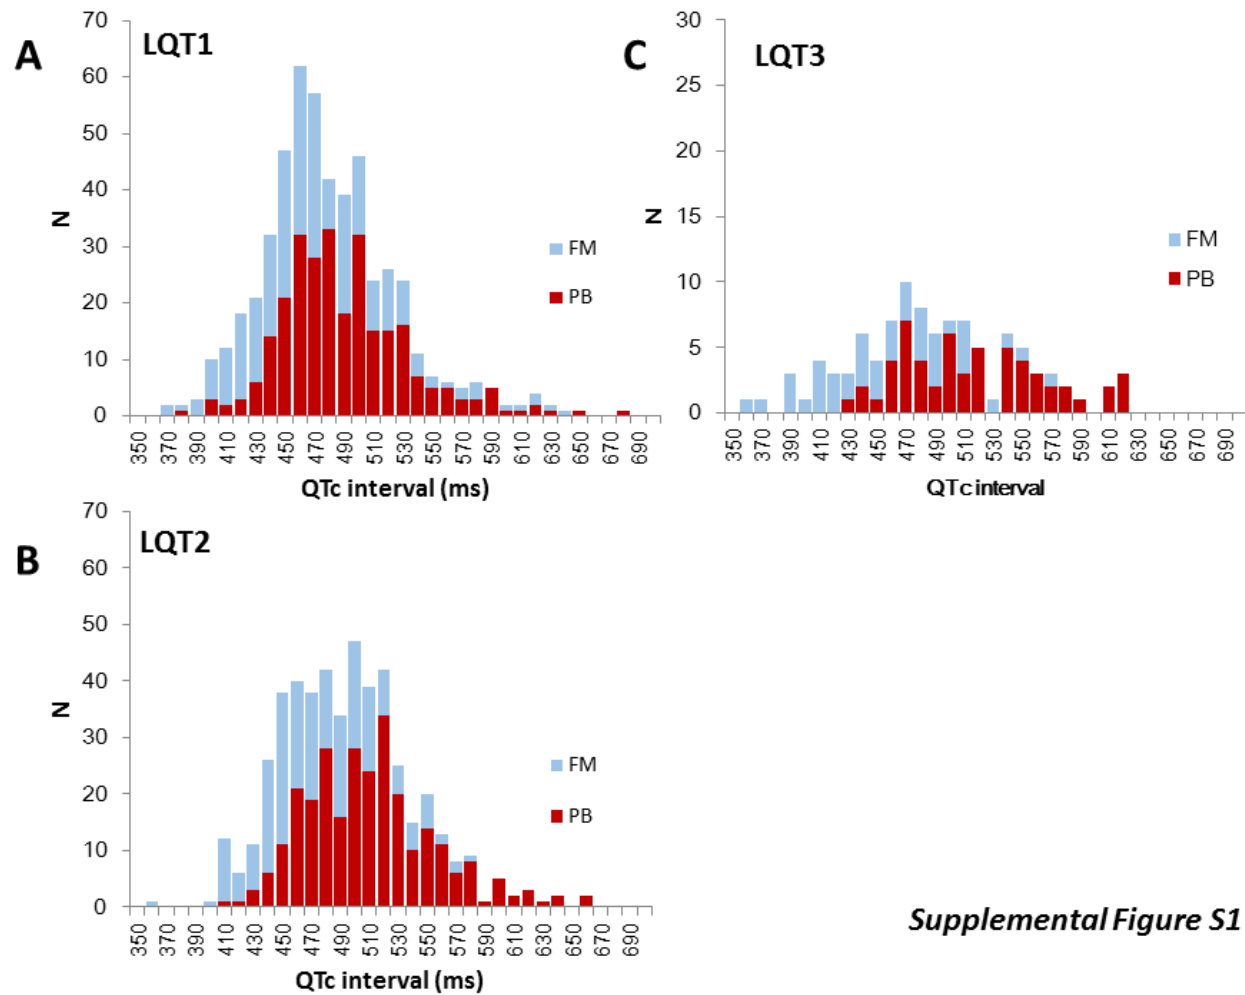

Supplemental Figure S1

**Figure 1.** Distribution of QTc Intervals in Genotyped Congenital Long QT Syndrome  
**A:** LQT1, **B:** LQT2, and **C:** LQT3. Red bar: probands (PB), Blue bar: family members (FM).

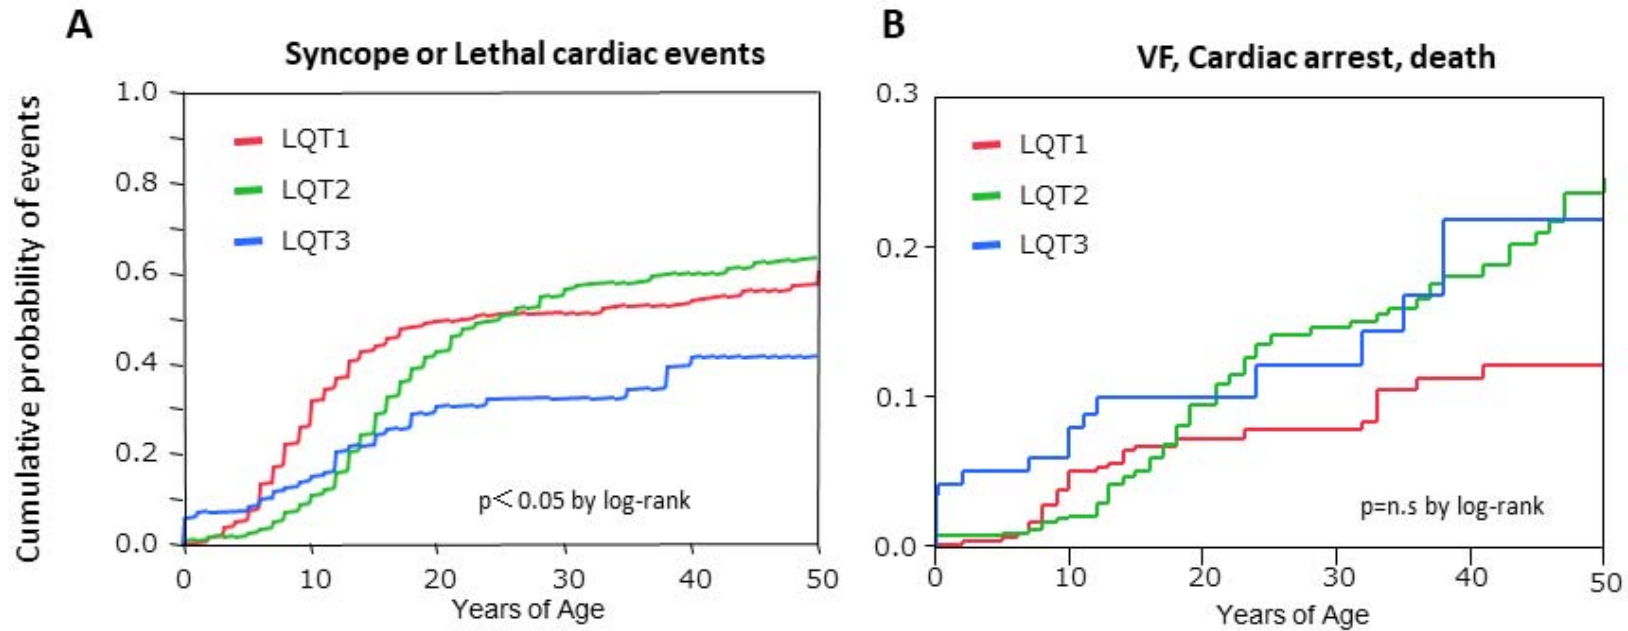

**eFigure 2.** Cumulative Probability of First Event in Each Genotype of Congenital Long-QT Syndrome

A, Syncope or lethal cardiac events. B, Only lethal cardiac event such as ventricular fibrillation, cardiac arrest or death.

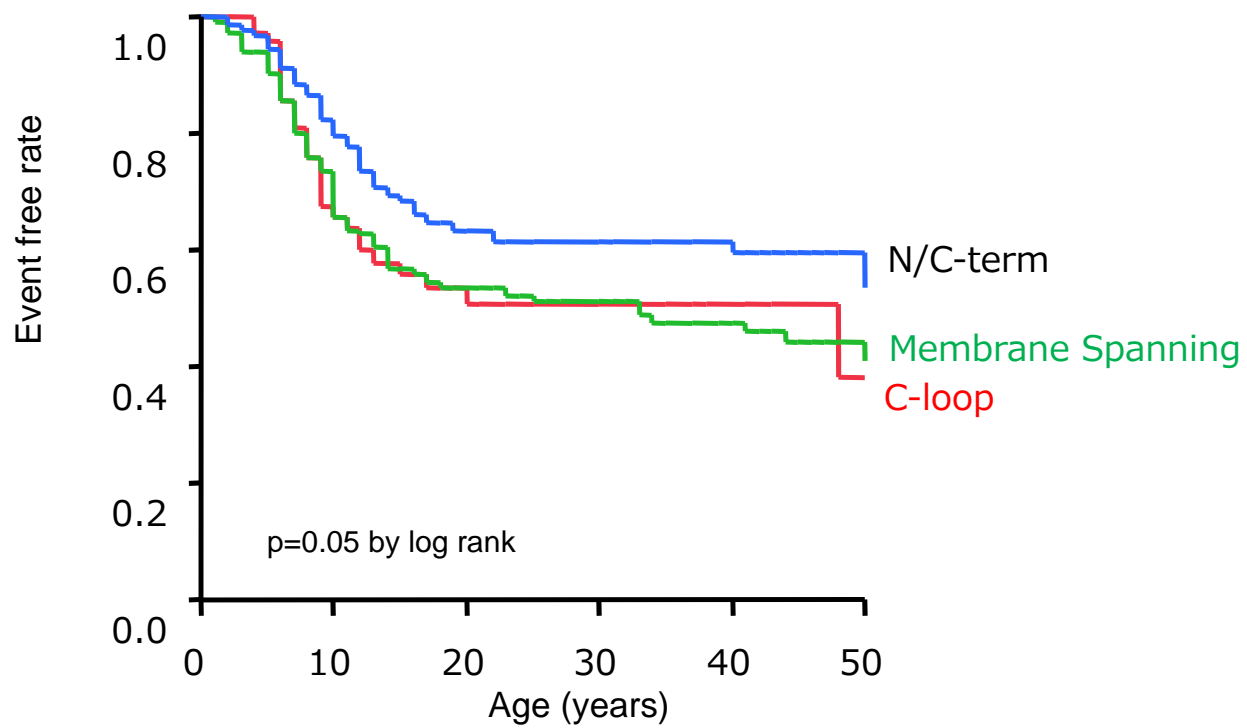

**eFigure 3.** Mutation Site-Specific Difference in Syncope or Lethal Cardiac Events in LQT1
